# Supplementary material
Source: HighWire-hosted journal article supplement (http://rc.rcjournal.com/highwire/filestream/21399/field_highwire_adjunct_files/4/8671suppl5.pdf)

### Supplementary Figure 5:

Effect of incubation duration on antibiotic susceptibility to tobramycin in the absence of tobramycin

Changes in MIC of Tobramycin with duration of incubation in the absence of TOB

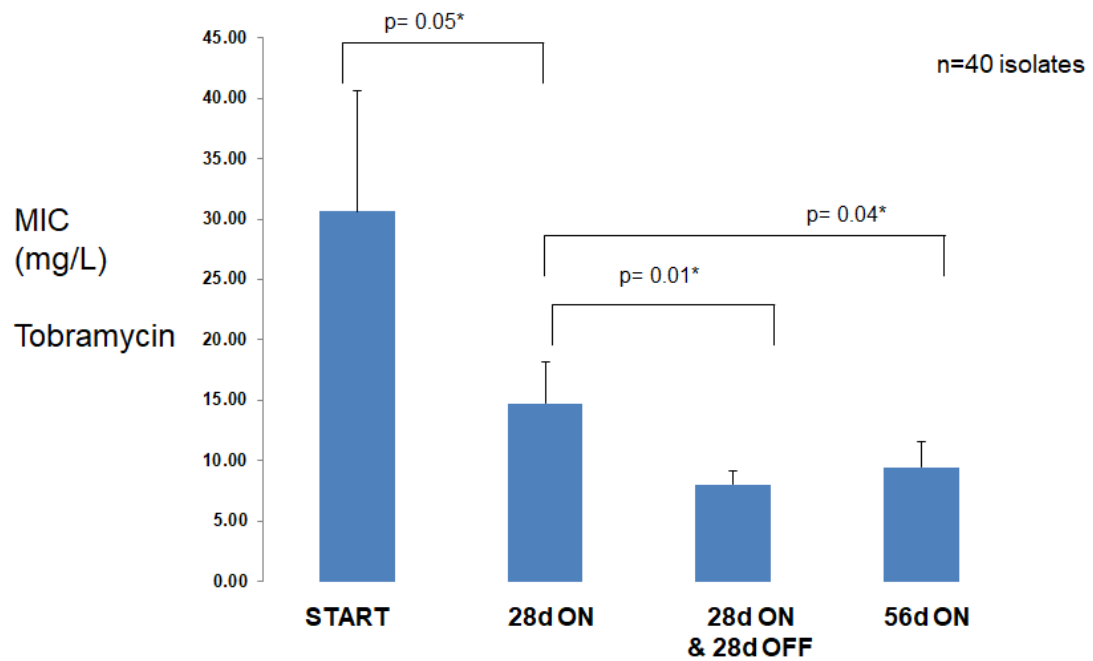

Supplement: 8671suppl5.pdf [file 8671suppl5.pdf]
